# Supplementary material for: Structure simulations for the 0.22 and 1 molar aqueous dimethylammonium chloride solutions
Source: Royal Society of Chemistry journal article supplement (doi:10.1039/c1cp22604e), 2011-11-23
Supplement: c1cp22604e.pdf [file c1cp22604e.pdf]

**Structure Simulations for the 0.22 and 1 Molar Aqueous  
Dimethylammonium Chloride Solutions**

Peter I. Nagy<sup>b</sup>

Center for Drug Design and Development, The University of Toledo, Toledo, OH  
43606-3390, e-mail: [pnagy@utnet.utoledo.edu](mailto:pnagy@utnet.utoledo.edu)

**Supplementary Information**

Table S1. IEF-PCM/B3LYP/6-311++G\*\* optimized geometry and derived charges for the  $\text{CH}_3\text{NH}_2\text{CH}_3^+$  solute in aqueous solution using different cavity models

| Geometry             | Bondi/united methyl | UA0    | Bondi/all-atom |
|----------------------|---------------------|--------|----------------|
| N-H <sub>av</sub>    | 1.023               | 1.037  | 1.022          |
| N-C <sub>av</sub>    | 1.500               | 1.499  | 1.498          |
| C-H <sub>av</sub>    | 1.089               | 1.089  | 1.087          |
| HNH                  | 105.47              | 104.69 | 105.56         |
| HNC <sub>av</sub>    | 109.32              | 109.61 | 109.22         |
| CNC                  | 113.77              | 113.67 | 114.06         |
| HCN <sub>av</sub>    | 108.38              | 108.52 | 108.40         |
| Charges <sup>a</sup> | CHELPG              | CHELPG | CHELPG         |
| N                    | 0.043               | 0.015  | 0.058          |
| H(N)                 | 0.290               | 0.310  | 0.284          |
| C                    | -0.251              | -0.245 | -0.232         |
| H(C)                 | 0.147               | 0.143  | 0.140          |

For Bondi/united methyl, radii from ref. 14b. In the Bondi/all-atom model, the carbon and methyl-hydrogen radii were set to 1.7 (the radius for a carbon atom in ref.14b) and 1.2 Å, respectively, and a scaling factor 1.2 was applied, whereas the N and polar H parameters were preserved as used in the Bondi/united methyl optimization. The number of cavity centers are 5, 3 (UA0) and 11 through the geometry optimizations with the three cavity models, respectively. <sup>a</sup>Rounded charges.

Table S2. Geometric parameters obtained in IEF-PCM/6-311++G\*\* optimizations for the complexes in aqueous solution

---

|                                                       |       |       |
|-------------------------------------------------------|-------|-------|
| $\text{CH}_3\text{NH}_2^+\text{CH}_3\dots\text{Cl}^-$ | MP2   | B97D  |
| N-H(...Cl)                                            | 1.056 | 1.065 |
| H...Cl                                                | 1.967 | 2.020 |
| N...Cl                                                | 3.013 | 3.080 |
| N-H...Cl                                              | 170.1 | 173.3 |
| <br>                                                  |       |       |
| $\text{CH}_3\text{NH}_2^+\text{CH}_3\dots\text{OH}_2$ |       |       |
| N-H(...O)                                             | 1.040 | 1.053 |
| H...O                                                 | 1.749 | 1.733 |
| N...O                                                 | 2.776 | 2.781 |
| N-H...O                                               | 168.6 | 173.1 |

---

Bond lengths in Å, bond angles in degrees. Geometric data for the dimethylammonium hydrogen in hydrogen bond to the partner molecule in the complex.

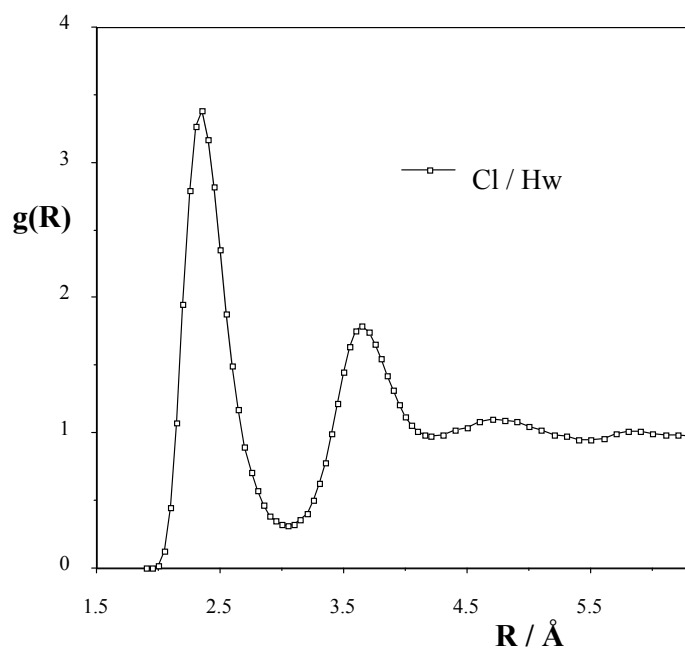

Fig. S1. A  $\text{Cl}^- \dots \text{H}_{\text{water}}$  radial distribution function when the anion is fully exposed to solvation. First maximum and minimum are at  $R = 2.35$   $\text{\AA}$  and  $3.05$   $\text{\AA}$ , respectively. Assuming a linear  $\text{O-H}_1 \dots \text{Cl}^-$  hydrogen bond of  $2.35$   $\text{\AA}$  with a TIP4P water molecule, the  $\text{Cl}^- \dots \text{H}_2$  distance (distance to the other hydrogen) is  $3.67$   $\text{\AA}$ , accounting for the second peak.
